# Supplementary material
Source: HighWire-hosted journal article supplement (https://bibliotheek.ehb.be/content/49/9/621)
Supplement: inline-supplementary-material-1 [file inline-supplementary-material-1.pdf]

Supplemental Tables:

Supplemental Table 1: Psychosocial Interventions in Substance Use Disorders

| Psychosocial Intervention                         | Description/Role in Substance Use Disorder Care                                                                                                                                  |
|---------------------------------------------------|----------------------------------------------------------------------------------------------------------------------------------------------------------------------------------|
| Cognitive-behavioral therapy                      | Challenge dysfunctional thoughts about substance use, assist with craving coping and promotion of non-drug related activities.                                                   |
| Motivational interviewing and enhancement therapy | Allow patient to self-enunciate negative effects of substance use upon their lives and provide impetus for change.                                                               |
| Brief interventions                               | Done to intervene in preliminary, risky behavior scenarios rather than moderate or severe substance use disorders.                                                               |
| Contingency management                            | Provide vouchers (monetary or otherwise) to patients for appropriate/concordant urine drug screens and provide positive reinforcement for abstinence.                            |
| Therapeutic communities                           | Provide residential rehabilitation program (1-24 months) for patients to live and work with other patients who use drugs, those who formerly used drugs, and professional staff. |
| Relapse prevention models                         | Helps to identify situations or states where patients or most vulnerable to drug use and how to avoid high-risk situations.                                                      |

Management of Patients with AUD in the Perioperative Period

Supplemental Tables (cont.):

Supplemental Tables 2: Organ System Based Clinical Concerns and Considerations

|         |                                                                                                                                                                                                                                                                                                                                                                                                                                                                                                                                                                                                                                                                                                                                                                                                                                                                                                                                                                                                                                                                                                                                                                           |                                                                                                                                                                                                                                                                                                                                                                                                                                                                                                                                                                                                                                                                                                                                                                                                                                                                                       |
|---------|---------------------------------------------------------------------------------------------------------------------------------------------------------------------------------------------------------------------------------------------------------------------------------------------------------------------------------------------------------------------------------------------------------------------------------------------------------------------------------------------------------------------------------------------------------------------------------------------------------------------------------------------------------------------------------------------------------------------------------------------------------------------------------------------------------------------------------------------------------------------------------------------------------------------------------------------------------------------------------------------------------------------------------------------------------------------------------------------------------------------------------------------------------------------------|---------------------------------------------------------------------------------------------------------------------------------------------------------------------------------------------------------------------------------------------------------------------------------------------------------------------------------------------------------------------------------------------------------------------------------------------------------------------------------------------------------------------------------------------------------------------------------------------------------------------------------------------------------------------------------------------------------------------------------------------------------------------------------------------------------------------------------------------------------------------------------------|
| Nervous | <ul style="list-style-type: none"><li>Excessive alcohol intake can result in neurological complications, with many secondary to nutritional deficiencies. Electrolyte and metabolic derangements should quickly be corrected to prevent permanent brain or nerve damage.</li><li>Wernicke Encephalopathy (WE), an acute neuropsychiatric condition, can arise due to thiamine deficiency. WE can also be precipitated if IV dextrose-containing solutions is administered in a patient with thiamine deficiency. Thiamine deficiency can impair brain energy utilization.<sup>1,2</sup></li><li>Chronic alcohol use can lead to alcohol-related cerebellar degeneration, alcohol-related dementia as well as hepatic encephalopathy.</li><li>Chronic alcohol use can lead to alcoholic neuropathy and may result in sensory, motor and autonomic dysfunction.<sup>3</sup> Direct toxic effects of alcohol and chronic malnutrition affect the nervous system.<sup>4</sup></li><li>Skeletal muscle weakness and atrophy is seen in patients with alcoholic myopathy and may lead to hyperkalemia, myoglobinuria and subsequent kidney dysfunction.<sup>5,6</sup></li></ul> | <ul style="list-style-type: none"><li>Assess decision making capacity and postpone case if elective.</li><li>Document pre-existing neurologic or musculoskeletal abnormalities.</li><li>Avoid use of succinylcholine in patients with myopathy or profound muscle weakness.</li><li>Assess need to emergently secure airway.</li><li>Weigh risks and benefits of regional anesthesia in patients with peripheral neuropathy or if patient cooperation is a concern.</li><li>Careful intraoperative positioning and padding given increased risk for peripheral nerve injury.</li><li>Consider intraoperative electroencephalogram (EEG) monitoring to detect seizure activity if concern for withdrawal.</li><li>After surgery, transfer to ICU if needed. Employ CIWA-Ar to manage withdrawal symptoms.</li><li>Multimodal analgesia for pain. Consult acute pain service.</li></ul> |
|---------|---------------------------------------------------------------------------------------------------------------------------------------------------------------------------------------------------------------------------------------------------------------------------------------------------------------------------------------------------------------------------------------------------------------------------------------------------------------------------------------------------------------------------------------------------------------------------------------------------------------------------------------------------------------------------------------------------------------------------------------------------------------------------------------------------------------------------------------------------------------------------------------------------------------------------------------------------------------------------------------------------------------------------------------------------------------------------------------------------------------------------------------------------------------------------|---------------------------------------------------------------------------------------------------------------------------------------------------------------------------------------------------------------------------------------------------------------------------------------------------------------------------------------------------------------------------------------------------------------------------------------------------------------------------------------------------------------------------------------------------------------------------------------------------------------------------------------------------------------------------------------------------------------------------------------------------------------------------------------------------------------------------------------------------------------------------------------|

Management of Patients with AUD in the Perioperative Period

|             |                                                                                                                                                                                                                                                                                                                                                                                                                                                                                                                                                                                                                                                                                                                                                                                                                                                                                                                                                                                                                                                                                                                                                                    |                                                                                                                                                                                                                                                                                                                                                                                                                                                                                                                                                                                                                                                                                                                                                                                                                                                                                                                                                                                                                                                                                                                                                            |
|-------------|--------------------------------------------------------------------------------------------------------------------------------------------------------------------------------------------------------------------------------------------------------------------------------------------------------------------------------------------------------------------------------------------------------------------------------------------------------------------------------------------------------------------------------------------------------------------------------------------------------------------------------------------------------------------------------------------------------------------------------------------------------------------------------------------------------------------------------------------------------------------------------------------------------------------------------------------------------------------------------------------------------------------------------------------------------------------------------------------------------------------------------------------------------------------|------------------------------------------------------------------------------------------------------------------------------------------------------------------------------------------------------------------------------------------------------------------------------------------------------------------------------------------------------------------------------------------------------------------------------------------------------------------------------------------------------------------------------------------------------------------------------------------------------------------------------------------------------------------------------------------------------------------------------------------------------------------------------------------------------------------------------------------------------------------------------------------------------------------------------------------------------------------------------------------------------------------------------------------------------------------------------------------------------------------------------------------------------------|
| Circulatory | <ul style="list-style-type: none"><li>Alcohol and its toxic metabolites, particularly acetaldehyde, can damage the cardiovascular system. It increases the risk of diseases such as coronary heart disease, stroke, hypertension and cardiomyopathy; the dose and pattern of use heavily influences these risks.<sup>7</sup></li><li>Binge drinking and chronic alcohol consumption is associated with increased cardiovascular risk and mortality. While moderate alcohol consumption is associated with a decrease in coronary heart disease (CHD) and stroke.<sup>7-9</sup></li><li>Acute intoxication results in a negative inotropic effect and increases the chances of arrhythmias. New onset atrial fibrillation has been linked to binge drinking and it increases cardiovascular complications including stroke and sudden cardiac death.<sup>10</sup></li><li>Chronic alcohol consumption remains a leading cause for alcoholic cardiomyopathy (ACM), a cardiac disease that is characterized by left ventricular (LV) dilatation, increased LV mass, reduced or normal LV wall thickness, systolic and diastolic heart failure.<sup>11</sup></li></ul> | <ul style="list-style-type: none"><li>Employ 12-lead electrocardiogram (EKG) to evaluate for arrhythmia and myocardial infarction(MI).</li><li>Consider chest x-ray (CXR) to rule out cardiomegaly and pulmonary congestion.</li><li>Consider arterial line given propensity for hemodynamic instability.</li><li>Induction agents: In hemodynamically stable patients, propofol is tolerated. Consider etomidate (minimal cardio-depressant effect) or ketamine (sympathomimetic) if unstable and adrenergic depletion is not a concern.</li><li>Consider modified rapid sequence intubation (RSI) in patients with significant alterations in cardiac function or volume status.</li><li>Replenish thiamine to avoid rapid depletion if glucose containing solution used, as this may lead to circulatory collapse.</li><li>Determine the need for advanced hemodynamic monitoring (pulmonary artery catheter (PAC), esophageal doppler, TEE to monitor fluid optimization), particularly if ACM is a concern</li><li>Assess hemodynamic stability in the context of neuraxial anesthesia as it pertains to volume status and cardiac function</li></ul> |
|-------------|--------------------------------------------------------------------------------------------------------------------------------------------------------------------------------------------------------------------------------------------------------------------------------------------------------------------------------------------------------------------------------------------------------------------------------------------------------------------------------------------------------------------------------------------------------------------------------------------------------------------------------------------------------------------------------------------------------------------------------------------------------------------------------------------------------------------------------------------------------------------------------------------------------------------------------------------------------------------------------------------------------------------------------------------------------------------------------------------------------------------------------------------------------------------|------------------------------------------------------------------------------------------------------------------------------------------------------------------------------------------------------------------------------------------------------------------------------------------------------------------------------------------------------------------------------------------------------------------------------------------------------------------------------------------------------------------------------------------------------------------------------------------------------------------------------------------------------------------------------------------------------------------------------------------------------------------------------------------------------------------------------------------------------------------------------------------------------------------------------------------------------------------------------------------------------------------------------------------------------------------------------------------------------------------------------------------------------------|

Management of Patients with AUD in the Perioperative Period

|             |                                                                                                                                                                                                                                                                                                                                                                                                                                                                                                                                                                                                                                                                                                                                                                                                                                                                                                                                                                           |                                                                                                                                                                                                                                                                                                                                                                                                                                                                                                                                                                                                                                      |
|-------------|---------------------------------------------------------------------------------------------------------------------------------------------------------------------------------------------------------------------------------------------------------------------------------------------------------------------------------------------------------------------------------------------------------------------------------------------------------------------------------------------------------------------------------------------------------------------------------------------------------------------------------------------------------------------------------------------------------------------------------------------------------------------------------------------------------------------------------------------------------------------------------------------------------------------------------------------------------------------------|--------------------------------------------------------------------------------------------------------------------------------------------------------------------------------------------------------------------------------------------------------------------------------------------------------------------------------------------------------------------------------------------------------------------------------------------------------------------------------------------------------------------------------------------------------------------------------------------------------------------------------------|
| Respiratory | <ul style="list-style-type: none"><li>• Comorbid tobacco use is common in heavy drinkers, and the extent of lung pathology in smokers should be assessed with history, clinical exam, and pulmonary function tests if indicated.<sup>12</sup></li><li>• Acute alcohol use alters mental status, blunts the gag and cough reflex, and increases aspiration risk.<sup>13</sup></li><li>• Chronic alcohol use impairs the host’s immune defense by altering oropharyngeal flora, response of innate immune cells, alveolar macrophages, neutrophils and lymphocytes; predisposing the host to bacterial pneumonia, tuberculosis (TB), respiratory syncytial virus (RSV) and acute respiratory distress syndrome (ARDS).<sup>13–15</sup></li><li>• Alcohol is thought to decrease hemoglobin’s affinity for oxygen, lead to a greater degree of desaturation during periods of hypoxic stress and affects the oxygen-hemoglobin dissociation curve.<sup>16,17</sup></li></ul> | <ul style="list-style-type: none"><li>• Consider baseline CXR.</li><li>• Continue home medications (including nebulizers) if history of chronic obstructive pulmonary disease (COPD) or asthma.</li><li>• Elevate head of bed throughout perioperative period given increased risk of aspiration</li><li>• Adequate preoxygenation due to increased risk of desaturation</li><li>• Consider rapid sequence intubation (RSI) with cuffed endotracheal tube (ETT)</li><li>• Individualize lung protective ventilation strategy to include low tidal volume + positive end-expiratory pressure (PEEP) + recruitment maneuvers</li></ul> |
|-------------|---------------------------------------------------------------------------------------------------------------------------------------------------------------------------------------------------------------------------------------------------------------------------------------------------------------------------------------------------------------------------------------------------------------------------------------------------------------------------------------------------------------------------------------------------------------------------------------------------------------------------------------------------------------------------------------------------------------------------------------------------------------------------------------------------------------------------------------------------------------------------------------------------------------------------------------------------------------------------|--------------------------------------------------------------------------------------------------------------------------------------------------------------------------------------------------------------------------------------------------------------------------------------------------------------------------------------------------------------------------------------------------------------------------------------------------------------------------------------------------------------------------------------------------------------------------------------------------------------------------------------|

Management of Patients with AUD in the Perioperative Period

|                  |                                                                                                                                                                                                                                                                                                                                                                                                                                                                                                                                                                                                                                                                                                                                                                                                                                                                                                                                                                                                                                                                                                                                                                                                                                                                                                                                                                                                                                                                                                           |                                                                                                                                                                                                                                                                                                                                                                                                                                                                                                                                                                                                                                                                                                                                                                                                                                                                                                                                                                                                                                                                                                |
|------------------|-----------------------------------------------------------------------------------------------------------------------------------------------------------------------------------------------------------------------------------------------------------------------------------------------------------------------------------------------------------------------------------------------------------------------------------------------------------------------------------------------------------------------------------------------------------------------------------------------------------------------------------------------------------------------------------------------------------------------------------------------------------------------------------------------------------------------------------------------------------------------------------------------------------------------------------------------------------------------------------------------------------------------------------------------------------------------------------------------------------------------------------------------------------------------------------------------------------------------------------------------------------------------------------------------------------------------------------------------------------------------------------------------------------------------------------------------------------------------------------------------------------|------------------------------------------------------------------------------------------------------------------------------------------------------------------------------------------------------------------------------------------------------------------------------------------------------------------------------------------------------------------------------------------------------------------------------------------------------------------------------------------------------------------------------------------------------------------------------------------------------------------------------------------------------------------------------------------------------------------------------------------------------------------------------------------------------------------------------------------------------------------------------------------------------------------------------------------------------------------------------------------------------------------------------------------------------------------------------------------------|
| Gastrointestinal | <ul style="list-style-type: none"><li>Alcohol consumption affects all parts of the gastrointestinal system (GI). AUD patients are prone to mucosal inflammation (glossitis, stomatitis etc), as well as dental caries, tooth decay, loss of tooth and gum disease.<sup>18</sup></li><li>AUD patients are prone to peptic ulcer bleeding, gastroesophageal reflux disease (GERD), reflux esophagitis, delayed gastric emptying, acute and chronic pancreatitis and decreased bowel motility which increases the risk of aspiration. They are malnourished (particularly in vitamins B1, B6, and B9), and experience acid-base disturbances, hyperuricemia, and electrolyte derangements (hypokalemia, hypomagnesemia, and hyponatremia).<sup>19–21</sup></li><li>Damage to the liver can lead to impaired detoxification, reduced protein synthesis and binding, all of which can cause increased bioavailability and drug distribution.<sup>22</sup> Chronic alcohol consumption induces the cytochrome p450 system (CYP2E1), increasing its activity while acute intoxication can decrease its activity and prolong effects of these drugs, as detailed in Table 4.<sup>23</sup> About 5–15% of patients with liver cirrhosis will have esophageal variceal hemorrhage (VH).<sup>24</sup></li><li>Most Medications used perioperatively have no manufacturer-suggested dosing guides for AUD and in vivo studies for this clinical setting either do not exist or have limited clinical value.</li></ul> | <ul style="list-style-type: none"><li>Consider proton pump inhibitor, H2 antagonist, non-particulate antacid.</li><li>Obtain complete metabolic panel (CMP).</li><li>Evaluate for electrolyte abnormalities and hypoglycemia.</li><li>Consider RSI with a cuffed ETT. Minimize abdominal insufflation.</li><li>Nasogastric/Orogastric (NG/OG) tube to suction after intubation and prior to extubation.</li><li>Acute intoxication (lower anesthetic requirements): Anticipate lower MAC, Bispectral index (BIS) readings and intravenous and inhaled anesthetic agents.</li><li>Chronic alcohol use (higher anesthetic requirements): Higher doses of intravenous (IV) (propofol and opioids) and inhalation anesthetic agents.</li><li>Larger doses of neuromuscular blocking (NMB) agents due to increased volume of distribution and duration of action may be longer.</li><li>Prolonged duration of action of succinylcholine due to decrease in plasma cholinesterase in severe liver disease.</li><li>Consider cisatracurium or atracurium for NMB due to Hoffman elimination</li></ul> |
|------------------|-----------------------------------------------------------------------------------------------------------------------------------------------------------------------------------------------------------------------------------------------------------------------------------------------------------------------------------------------------------------------------------------------------------------------------------------------------------------------------------------------------------------------------------------------------------------------------------------------------------------------------------------------------------------------------------------------------------------------------------------------------------------------------------------------------------------------------------------------------------------------------------------------------------------------------------------------------------------------------------------------------------------------------------------------------------------------------------------------------------------------------------------------------------------------------------------------------------------------------------------------------------------------------------------------------------------------------------------------------------------------------------------------------------------------------------------------------------------------------------------------------------|------------------------------------------------------------------------------------------------------------------------------------------------------------------------------------------------------------------------------------------------------------------------------------------------------------------------------------------------------------------------------------------------------------------------------------------------------------------------------------------------------------------------------------------------------------------------------------------------------------------------------------------------------------------------------------------------------------------------------------------------------------------------------------------------------------------------------------------------------------------------------------------------------------------------------------------------------------------------------------------------------------------------------------------------------------------------------------------------|

Management of Patients with AUD in the Perioperative Period

|            |                                                                                                                                                                                                                                                                                                                                                                                                                                                                                                                                                                                                                                                                                                                                                                                                                                                                           |                                                                                                                                                                                                                                                                                                                                                                                                                                                                                                                                                                                                                                                                                                                                                                                          |
|------------|---------------------------------------------------------------------------------------------------------------------------------------------------------------------------------------------------------------------------------------------------------------------------------------------------------------------------------------------------------------------------------------------------------------------------------------------------------------------------------------------------------------------------------------------------------------------------------------------------------------------------------------------------------------------------------------------------------------------------------------------------------------------------------------------------------------------------------------------------------------------------|------------------------------------------------------------------------------------------------------------------------------------------------------------------------------------------------------------------------------------------------------------------------------------------------------------------------------------------------------------------------------------------------------------------------------------------------------------------------------------------------------------------------------------------------------------------------------------------------------------------------------------------------------------------------------------------------------------------------------------------------------------------------------------------|
| Hematology | <ul style="list-style-type: none"><li>Alterations in coagulation are common in AUD patients with a risk of both bleeding and thrombosis due to thrombocytopenia, platelet dysfunction, and alterations in procoagulant and anticoagulant factors.<sup>25,26</sup></li><li>International normalized ratio (INR) may not account for the degree of liver disease and tests like thromboelastography (TEG) and rotational thromboelastometry (ROTEM) do not have defined clinical parameters.<sup>26</sup></li><li>Alcohol can interact with both prescription and over the counter (OTC) medications. Patients who routinely use aspirin or NSAIDs should be counseled about an increased bleeding time, especially when alcohol (about 4 drinks) is consumed at the same time as these medication; as this can result in gastrointestinal bleeding.<sup>27</sup></li></ul> | <ul style="list-style-type: none"><li>Obtain complete blood count, coagulation studies, such as prothrombin(PT) and INR.</li><li>Correct anemia, thrombocytopenia, coagulopathies, and other hematologic deficiencies prior to surgery.</li><li>Regional techniques may be contraindicated in patient with coagulopathy.</li><li>Monitor with TEG if available</li><li>If TEG is not available, fresh frozen plasma (FFP) is an option to correct factor deficiencies or INR &gt; 1.5</li><li>Cryoprecipitate or desmopressin (DDAVP) may be used for additional correction of coagulopathy if needed</li><li>Use of tranexamic acid or aminocaproic acid can be considered, but do carry risk of thrombotic complications and have not been shown to reduce variceal bleeding</li></ul> |
|------------|---------------------------------------------------------------------------------------------------------------------------------------------------------------------------------------------------------------------------------------------------------------------------------------------------------------------------------------------------------------------------------------------------------------------------------------------------------------------------------------------------------------------------------------------------------------------------------------------------------------------------------------------------------------------------------------------------------------------------------------------------------------------------------------------------------------------------------------------------------------------------|------------------------------------------------------------------------------------------------------------------------------------------------------------------------------------------------------------------------------------------------------------------------------------------------------------------------------------------------------------------------------------------------------------------------------------------------------------------------------------------------------------------------------------------------------------------------------------------------------------------------------------------------------------------------------------------------------------------------------------------------------------------------------------------|

Management of Patients with AUD in the Perioperative Period

|                      |                                                                                                                                                                                                                                                                                                                                                                                                                                                                                                                                                                                                                                                                                                                                                                                                              |                                                                                                                                                                                                                                                                                                                                                                                    |
|----------------------|--------------------------------------------------------------------------------------------------------------------------------------------------------------------------------------------------------------------------------------------------------------------------------------------------------------------------------------------------------------------------------------------------------------------------------------------------------------------------------------------------------------------------------------------------------------------------------------------------------------------------------------------------------------------------------------------------------------------------------------------------------------------------------------------------------------|------------------------------------------------------------------------------------------------------------------------------------------------------------------------------------------------------------------------------------------------------------------------------------------------------------------------------------------------------------------------------------|
| Immune               | <ul style="list-style-type: none"><li>• The immune system, both innate and adaptive, is adversely affected by alcohol consumption, resulting in abnormal function of neutrophils and macrophages. An imbalance in proinflammatory and anti-inflammatory cytokines is thought to be a primary factor in the increased incidence of nosocomial infection and sepsis.<sup>28</sup></li><li>• Alcohol has a dose dependent effect on the immune system. Chronic heavy drinking leads to an increased susceptibility to both bacterial and viral infection, while light to moderate drinking results in less inflammation and better response to vaccination.<sup>29</sup></li></ul>                                                                                                                              | <ul style="list-style-type: none"><li>• Strict adhere to anti-infective practice guidelines with invasive lines such as epidurals. Pre-incision antibiotic prophylaxis for surgery type and specialty and redosing guidelines.</li><li>• Adhere to strategies to minimize central line associated bloodstream infections, ventilator and catheter associated infections.</li></ul> |
| Endocrine & Oncology | <ul style="list-style-type: none"><li>• The effects of alcohol on the endocrine system results in many downstream effects and affects many aspects of the body. Its effects can lead to psychological and behavior disturbances, thyroid abnormalities, reproductive issues, bone disease, cancers, growth deficits and abnormal responses to stress.<sup>30,31</sup></li><li>• All alcoholic drinks (wine, beer, and liquor) have been linked to the development of cancer. While chronic alcohol consumption and binge drinking carry a greater risk, even one drink per day can contribute to this risk. The increased risk is due to an acetaldehyde induced DNA damage with inhibited or incorrect repair. Cancer types include breast, liver, head and neck, and GI cancers.<sup>32,33</sup></li></ul> | <ul style="list-style-type: none"><li>• Monitor blood glucose levels as chronic alcohol consumption can lead to hypoglycemia.</li><li>• Educate patients on the carcinogenic risk of alcohol and counsel on a reduction in amount consumed or encourage abstinence if possible.</li></ul>                                                                                          |

## Management of Patients with AUD in the Perioperative Period

### Supplemental Figure Legends:

**Supplemental Figure 1: Prevalence of Substance Use Disorders.** Displays the prevalence of substance use disorders, stratified by substance, for the year 2020.



Management of Patients with AUD in the Perioperative Period

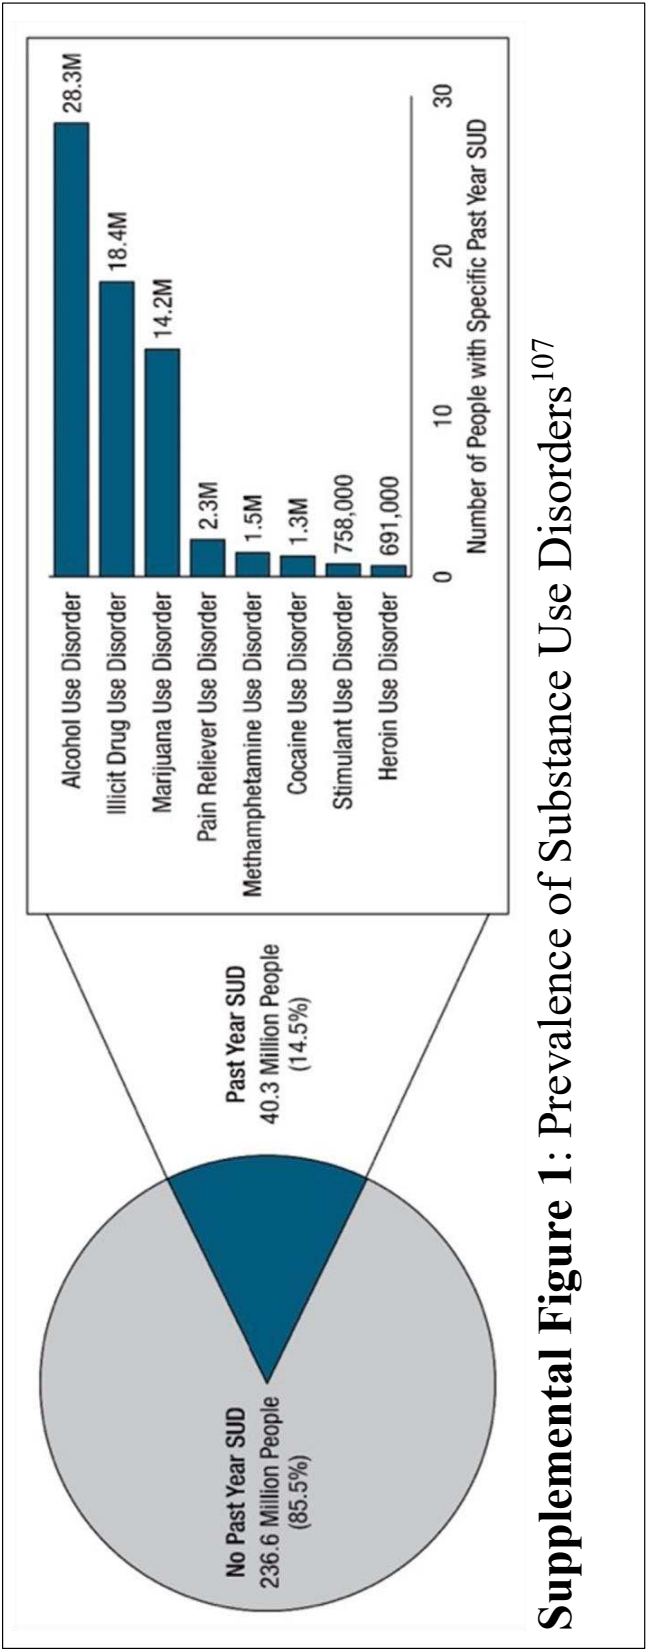

## Management of Patients with AUD in the Perioperative Period

### Supplemental Figure Legends (cont.):

**Supplemental Figure 2:** Multidisciplinary team approach coupled with multimodal treatment options in managing patients with AUD

Management of Patients with AUD in the Perioperative Period

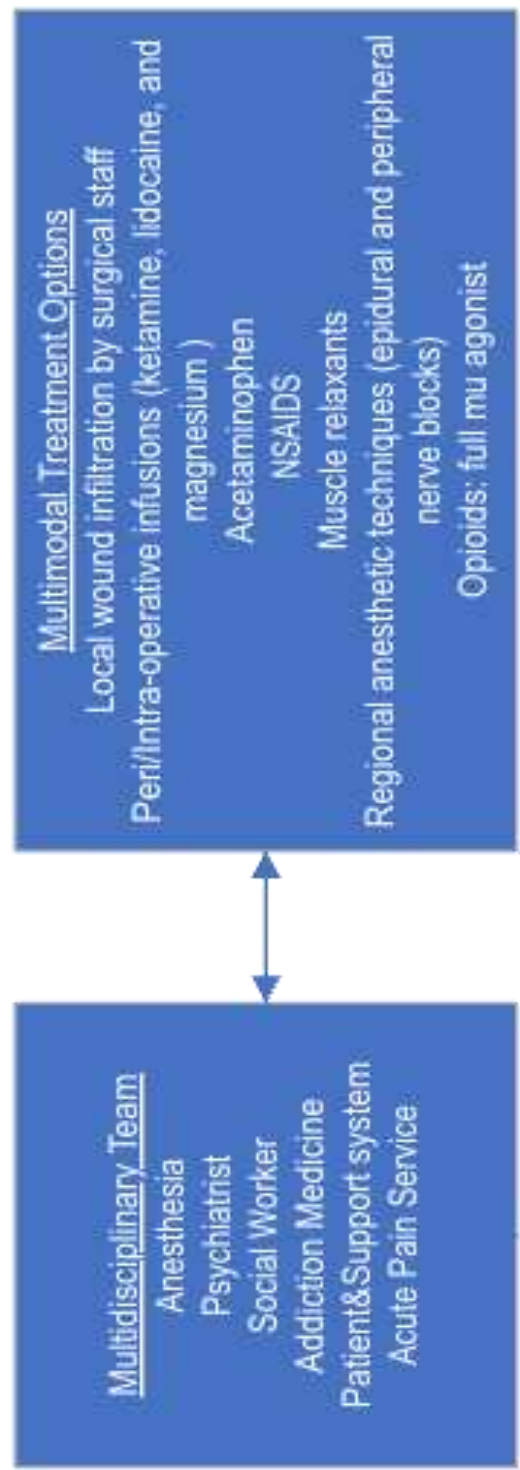

Figure 2. Multidisciplinary team approach coupled with multimodal treatment options in managing patients with AUD

## Management of Patients with AUD in the Perioperative Period

### Supplemental Figure Legends (cont.):

#### **Supplemental Figure 3:** Perioperative management of approved medications for AUD

Management of Patients with AUD in the Perioperative Period

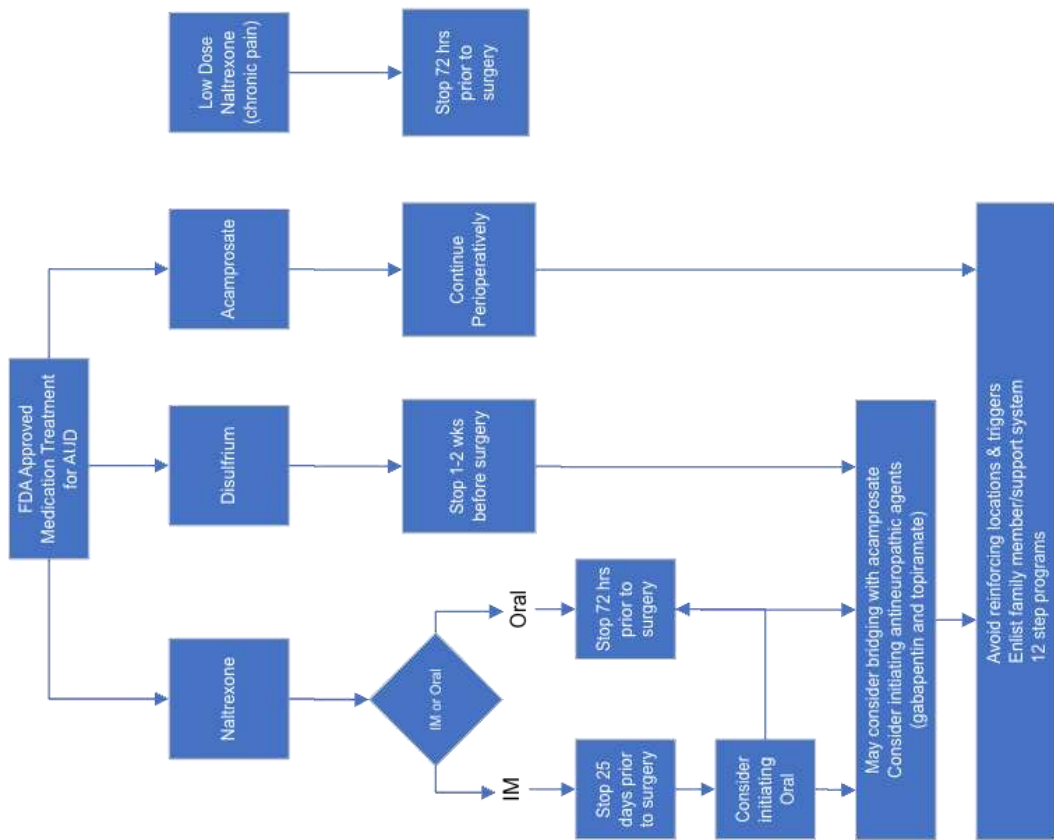

Figure 3. Perioperative management of approved medications for AUD

## Management of Patients with AUD in the Perioperative Period

### Supplemental Figure Legends (cont.):

#### **Supplemental Figure 4:** Re-initiation of Naltrexone and LDN

Management of Patients with AUD in the Perioperative Period

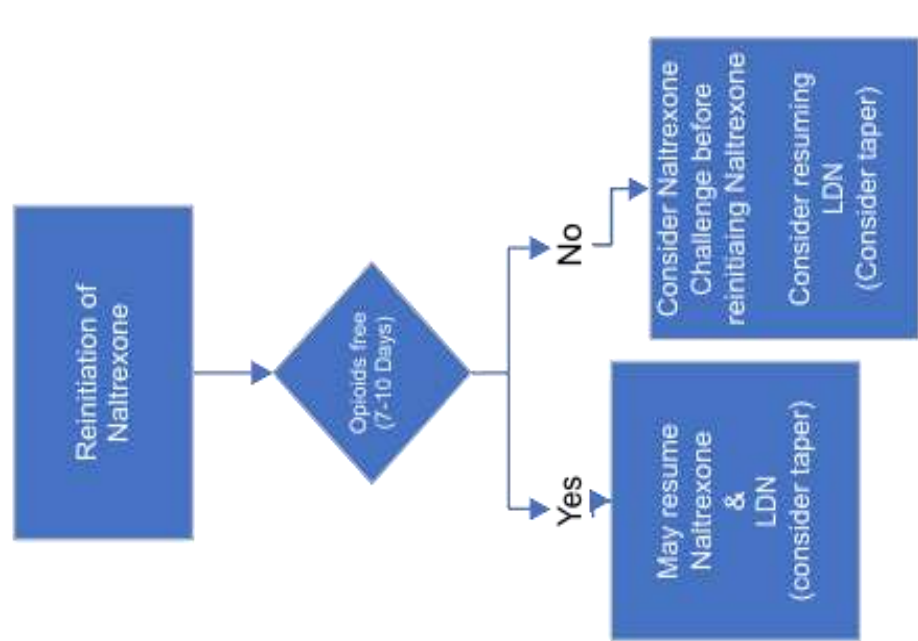

Figure 4. Reinitiation of Naltrexone and LDN

## Management of Patients with AUD in the Perioperative Period

### Supplemental References

1. Dhir S, Tarasenko M, Napoli E, Giulivi C. Neurological, Psychiatric, and Biochemical Aspects of Thiamine Deficiency in Children and Adults. *Front Psychiatry*. 2019;10:207. doi:10.3389/fpsy.2019.00207
2. Mukamal K. Overview of the risks and benefits of alcohol consumption. UpToDate; 2022. Accessed January 26, 2022. [www.uptodate.com/contents/overview-of-the-risks-and-benefits-of-alcohol-consumption](http://www.uptodate.com/contents/overview-of-the-risks-and-benefits-of-alcohol-consumption)
3. Mellion M, Gilchrist JM, de la Monte S. Alcohol-related peripheral neuropathy: nutritional, toxic, or both? *Muscle Nerve*. 2011;43(3):309-316. doi:10.1002/mus.21946
4. Sadowski A, Houck RC. Alcoholic Neuropathy. In: *StatPearls*. StatPearls Publishing; 2023. Accessed May 9, 2023. <http://www.ncbi.nlm.nih.gov/books/NBK499856/>
5. Caceres-Ayala C, Pautassi RM, Acuña MJ, Cerpa W, Rebolledo DL. The functional and molecular effects of problematic alcohol consumption on skeletal muscle: a focus on athletic performance. *Am J Drug Alcohol Abuse*. 2022;48(2):133-147. doi:10.1080/00952990.2022.2041025
6. Planas-Ballvé A, Grau-López L, Morillas RM, Planas R. Neurological manifestations of excessive alcohol consumption. *Gastroenterol Hepatol*. 2017;40(10):709-717. doi:10.1016/j.gastrohep.2017.05.011
7. Piano MR. Alcohol's Effects on the Cardiovascular System. *Alcohol Res*. 2017;38(2):219-241.
8. Chiva-Blanch G, Badimon L. Benefits and Risks of Moderate Alcohol Consumption on Cardiovascular Disease: Current Findings and Controversies. *Nutrients*. 2019;12(1):108. doi:10.3390/nu12010108
9. Goel S, Sharma A, Garg A. Effect of Alcohol Consumption on Cardiovascular Health. *Curr Cardiol Rep*. 2018;20(4):19. doi:10.1007/s11886-018-0962-2
10. Conen D, Tedrow UB, Cook NR, Moorthy MV, Buring JE, Albert CM. Alcohol Consumption and Risk of Incident Atrial Fibrillation in Women. *JAMA*. 2008;300(21):2489-2496. doi:10.1001/jama.2008.755
11. Piano MR, Phillips SA. Alcoholic cardiomyopathy: pathophysiologic insights. *Cardiovasc Toxicol*. 2014;14(4):291-308. doi:10.1007/s12012-014-9252-4
12. Shiffman S, Balabanis M. Do Drinking and Smoking Go Together? *Alcohol Health Res World*. 1996;20(2):107-110.
13. Gupta NM, Deshpande A, Rothberg MB. Pneumonia and alcohol use disorder: Implications for treatment. *Cleve Clin J Med*. 2020;87(8):493-500. doi:10.3949/ccjm.87a.19105



## Management of Patients with AUD in the Perioperative Period

14. Simet SM, Sisson JH. Alcohol's Effects on Lung Health and Immunity. *Alcohol Res.* 2015;37(2):199-208.
15. Fernández-Solá J, Junqué A, Estruch R, Monforte R, Torres A, Urbano-Márquez A. High Alcohol Intake as a Risk and Prognostic Factor for Community-Acquired Pneumonia. *Archives of Internal Medicine.* 1995;155(15):1649-1654. doi:10.1001/archinte.1995.00430150137014
16. van de Borne P, Mark AL, Montano N, Mion D, Somers VK. Effects of alcohol on sympathetic activity, hemodynamics, and chemoreflex sensitivity. *Hypertension.* 1997;29(6):1278-1283. doi:10.1161/01.hyp.29.6.1278
17. Adams C. Anaesthetic implications of acute and chronic alcohol abuse : Registrar Communication prize entry. *Southern African Journal of Anaesthesia and Analgesia.* 2010;16(3):42-49. doi:10.10520/EJC73767
18. Bode C, Bode JC. Alcohol's Role in Gastrointestinal Tract Disorders. *Alcohol Health Res World.* 1997;21(1):76-83.
19. Markowitz JS, McRae AL, Sonne SC. Oral nutritional supplementation for the alcoholic patient: a brief overview. *Ann Clin Psychiatry.* 2000;12(3):153-158. doi:10.1023/a:1009017018746
20. Ramsay M. Chapter 33. Anesthesia for Patients with Liver Disease. In: Butterworth JF, Mackey DC, Wasnick JD, eds. *Morgan & Mikhail's Clinical Anesthesiology.* 5th ed. The McGraw-Hill Companies; 2013. Accessed October 31, 2022. accessmedicine.mhmedical.com/content.aspx?aid=57235838
21. Mullen JL, Gertner MH, Buzby GP, Goodhart GL, Rosato EF. Implications of malnutrition in the surgical patient. *Arch Surg.* 1979;114(2):121-125. doi:10.1001/archsurg.1979.01370260011001
22. Steadman RH, Nguyen-Lee JW. Anesthesia for Surgical Procedures in Cirrhotic Patients Other than Liver Transplantation: Management, Concerns, and Pitfalls. In: Eghtesad B, Fung J, eds. *Surgical Procedures on the Cirrhotic Patient.* Springer International Publishing; 2017:57-69. doi:10.1007/978-3-319-52396-5\_5
23. Oneta CM, Lieber CS, Li J, et al. Dynamics of cytochrome P4502E1 activity in man: induction by ethanol and disappearance during withdrawal phase. *J Hepatol.* 2002;36(1):47-52. doi:10.1016/s0168-8278(01)00223-9
24. Jakab SS, Garcia-Tsao G. Screening and Surveillance of Varices in Patients With Cirrhosis. *Clin Gastroenterol Hepatol.* 2019;17(1):26-29. doi:10.1016/j.cgh.2018.03.012
25. Cowan DH. Effect of alcoholism on hemostasis. *Semin Hematol.* 1980;17(2):137-147.

## Management of Patients with AUD in the Perioperative Period

26. O'Leary JG, Greenberg CS, Patton HM, Caldwell SH. AGA Clinical Practice Update: Coagulation in Cirrhosis. *Gastroenterology*. 2019;157(1):34-43.e1. doi:10.1053/j.gastro.2019.03.070
27. Kaufman DW, Kelly JP, Wiholm BE, et al. The risk of acute major upper gastrointestinal bleeding among users of aspirin and ibuprofen at various levels of alcohol consumption. *Am J Gastroenterol*. 1999;94(11):3189-3196. doi:10.1111/j.1572-0241.1999.01517.x
28. de Wit M, Jones DG, Sessler CN, Zilberberg MD, Weaver MF. Alcohol-use disorders in the critically ill patient. *Chest*. 2010;138(4):994-1003. doi:10.1378/chest.09-1425
29. Barr T, Helms C, Grant K, Messaoudi I. Opposing Effects of Alcohol on the Immune System. *Prog Neuropsychopharmacol Biol Psychiatry*. 2016;65:242-251. doi:10.1016/j.pnpbp.2015.09.001
30. Rachdaoui N, Sarkar DK. Effects of alcohol on the endocrine system. *Endocrinol Metab Clin North Am*. 2013;42(3):593-615. doi:10.1016/j.ecl.2013.05.008
31. Allen NE, Beral V, Casabonne D, et al. Moderate alcohol intake and cancer incidence in women. *J Natl Cancer Inst*. 2009;101(5):296-305. doi:10.1093/jnci/djn514
32. Albermann ME, Musshoff F, Madea B. A high-performance liquid chromatographic-tandem mass spectrometric method for the determination of ethyl glucuronide and ethyl sulfate in urine validated according to forensic guidelines. *J Chromatogr Sci*. 2012;50(1):51-56. doi:10.1093/chromsci/bmr012
33. Wallner M, Olsen RW. Physiology and pharmacology of alcohol: the imidazobenzodiazepine alcohol antagonist site on subtypes of GABAA receptors as an opportunity for drug development? *Br J Pharmacol*. 2008;154(2):288-298. doi:10.1038/bjp.2008.32
